# Supplementary material for: Ionospheric Plasma Flows Associated with the Formation of the Distorted Nightside End of A Transpolar Arc
Source: Copernicus journal article supplement (doi:10.5194/angeo-2021-69), 2022-01-07
Supplement: Supplementary file [file angeo-2021-69-AC2-supplement.pdf]

# Reply to RC 2 (ANGEO-2021-69)

We appreciate very much the referee's kind and useful suggestion to our manuscript entitled "Ionospheric plasma flows associated with the formation of the distorted nightside end of a transpolar arc (ANGEO-2021-69)".

We have revised the manuscript in accordance with the suggestion from Referee2.

The referee's comment is written in **Red** and our reply is written in **Blue**.

L9 "flow patterns from 28th January 2002" should read "flow patterns occurring on 28 January 2002"

Thank you very much for your suggestion. We revised this sentence as you pointed out.

We also revised the relevant points of your suggestion. Please see Ls. 173, 184, and 208.
